# Supplementary material for: Genome binning of viral entities from bulk metagenomics data
Source: PubMed Central journal article supplement (PMC8857322; doi:10.1038/s41467-022-28581-5), 2022-02-18
Supplement: 41467_2022_28581_MOESM3_ESM.pdf [file 41467_2022_28581_MOESM3_ESM.pdf]

## Description of Additional Supplementary Files

**File Name:** Supplementary Data 1

**Description:** Putative Jumbo viruses.

**File Name:** Supplementary Data 2

**Description:** Viral proteins by host-genera.

**File Name:** Supplementary Data 3

**Description:** Enriched viral proteins by host-genera.

**File Name:** Supplementary Data 4

**Description:** Metadata file for Genomes included in CAMISIM simulation.
